# Supplementary material for: Salt Stress in Arabidopsis: Lipid Transfer Protein AZI1 and Its Control by Mitogen-Activated Protein Kinase MPK3
Source: PubMed Central journal article supplement (PMC3973493; doi:10.1093/mp/sst157), 2013-11-08
Supplement: supp_sst157_MPLANT20130022046_suppl_data.pdf [file supp_sst157_MPLANT20130022046_suppl_data.pdf]

# Supplementary data

## Suppl. figure S1

Confirmation of knock-out *azi1* mutant by RT-PCR.

Total RNA was isolated from 14-day-old seedlings. cDNA samples were amplified with primers for *Actin2* (control) or for *AZI1*.

## Suppl. figure S2

**Lower AZI1 levels in 35S::*AZI1/mpk3* lines are related to the *mpk3* mutant background.**

Proteins were extracted from 14-day-old seedlings originating from crossings of the *AZI1* overexpressing line 11.8 with *mpk3*. AZI1-myc protein was detected by immunoblot analysis after SDS-PAGE. Protein loading was visualised by Coomassie-blue staining. AZI1 X1 and X2 are wildtype for *MPK3*, while *AZI1/mpk3* (two independent lines shown) lack a functional *MPK3* allele. X1 and X2 have undergone the same crossing and seed propagation procedure as *AZI1/mpk3*.

## Suppl. figure S3

**The overall protein profiles in Arabidopsis wild-type, *azi1*, *mpk3*, 35S::*AZI1* and 35S::*AZI1/mpk3* plants look similar.**

Proteins from 14-day-old seedlings of the indicated lines (independent duplicate samples) were extracted in standard extraction buffer B1. 15 µg of the soluble protein fraction was separated by SDS-PAGE and visualised by Coomassie Blue staining.

## Suppl. figure S4

**Hydrophathy profile of AZI1 and variants carrying dephosphomimetic (alanine, A) or phosphomimetic (aspartate, D) residues at putative MAPK phosphorylation sites (Ser33, Ser41, Ser59, Thr66, Thr70).**

Data were computed for the full-length AZI1 protein sequence with or without one of the following replacements:

„AAA“: S33A,S41A,S59A

„DDD“: S33D,S41D,S59D

„AAAAA“:S33A,S41A,S59A,T66A,T70A

„DDDDD“: D,S41D,S59D,T66D,T70D

The **black curve** is the actual profile; the superimposed green curve is a smoothed version of the profile.

Regions that have a favorable free energy of transfer (predicted membrane-located regions) are indicated with horizontal red bars.

## **Suppl. figure S5**

### **Predicted stability of AZI1 and phosphovariant proteins.**

Sequences were submitted to the ExPASyProtParam tool. The computed instability index (II) inversely correlates with protein stability. Proteins with  $II < 40$  are predicted as stable. Note the decline in II upon successive exchange of putative phosphorylation sites by phosphomimetic aspartate (D) but not by dephosphomimetic alanine (A) residues.

## **Suppl. figure S6.**

Predicted O-glycosylation sites in AZI1.

The full-length AZI1 protein sequence was analysed using the bioinformatic online tool NetOGlyc, according to which “scores higher than 0.5 are predicted as glycosylated and marked with the string “#POSITIVE” in the comment field”. The relevant region comprising all predicted sites is displayed at the bottom. Nine candidate target sites for O-glycosylation (blue) are contained in the proline-rich domain of AZI1. Five of these (Ser33, Ser41, Ser59, Thr66, Thr70) overlap with putative MAPK target sites (red) (see also figure 1).

## **Suppl. figure S7**

Alignment of *Arabidopsis* AGP31 sequence of residues 98-129, a reportedly strongly glycosylated peptide (Hijazi et al., 2012), with the proline-rich domain of AZI1. Data were generated using the PRALINE software <http://www.ibi.vu.nl/programs/pralinewww/>.

**Table S1. Multiple stress-responsive LTPs**

Arabidopsis *LTP* genes responding to 6 or more types of abiotic stress, as identified in a functional genomics-based screen (Kant et al. 2008). \*Corresponding subfamily of cysteine-rich proteins (CRPs). Members of CRP4820, the only subfamily with strong conservation between monocots and dicots (Silverstein et al. 2007) are highlighted.

**Table S2 Statistic evaluation of data from germination and seedling survival assays**

| <b>Table S1. Multiple stress-responsive LTPs</b>                                                                                                                                                  |                   |
|---------------------------------------------------------------------------------------------------------------------------------------------------------------------------------------------------|-------------------|
| Arabidopsis <i>LTP</i> genes responding to 6 or more types of abiotic stress, as identified in a functional genomics-based screen (Kant et al. 2008).                                             |                   |
| *Corresponding subfamily of cysteine-rich proteins (CRPs). Members of CRP4820, the only subfamily with strong conservation between monocots and dicots (Silverstein et al. 2007) are highlighted. |                   |
| <b>LTP (PRD-8CM)</b>                                                                                                                                                                              | <b>Subfamily*</b> |
| AT5G59320                                                                                                                                                                                         | CRP3860           |
| AT5G59310                                                                                                                                                                                         | CRP3860           |
| AT3G51600                                                                                                                                                                                         | CRP3860           |
| AT3G43720                                                                                                                                                                                         | CRP4540           |
| AT3G22600                                                                                                                                                                                         | CRP4630           |
| AT1G27950                                                                                                                                                                                         | CRP4640           |
| AT2G37870                                                                                                                                                                                         | CRP4750           |
| AT3G18280                                                                                                                                                                                         | CRP4920           |
| AT1G62510                                                                                                                                                                                         | CRP4820           |
| AT2G10940                                                                                                                                                                                         | CRP4820           |
| AT2G45180                                                                                                                                                                                         | CRP4820           |
| AT4G12470                                                                                                                                                                                         | CRP4820           |
| AT4G22470                                                                                                                                                                                         | CRP4820           |

**Suppl. Table S2.1: Percentage germination of seeds of indicated plant lines on ½ MS+ 0.25% at various time points**

| Plant lines      | Day 1      |          |           | Day 2       |          |           | Day 3       |           |           | Day 4       |           |           | Day 5       |           |           |
|------------------|------------|----------|-----------|-------------|----------|-----------|-------------|-----------|-----------|-------------|-----------|-----------|-------------|-----------|-----------|
|                  | Mean ± SD  | p value* | p value # | Mean ± SD   | p value* | p value # | Mean ± SD   | p value * | p value # | Mean ± SD   | p value * | p value # | Mean ± SD   | p value * | p value # |
| <i>ColO</i>      | 95.60±5.75 | X        | NS        | 98.18±3.14  | X        | NS        | 98.78± 2.09 | X         | NS        | 98.78± 2.09 | X         | NS        | 98.78± 2.09 | X         | X         |
| <i>AZ11</i>      | 96.26±3.06 | NS       | X         | 98.44±1.99  | NS       | X         | 99.48± 1.02 | NS        | X         | 100.00±0.00 | NS        | X         | 100.00±0.00 | NS        | X         |
| <i>azi1</i>      | 30.91±9.11 | < 0.001  | < 0.001   | 67.01±8.10  | 0.002    | <0.001    | 78.81± 8.98 | 0.014     | 0.004     | 83.55± 5.53 | 0.007     | 0.001     | 88.29± 3.59 | 0.007     | 0.001     |
| <i>mpk3</i>      | 90.24±9.39 | NS       | NS        | 96.32±3.97  | NS       | NS        | 99.12± 1.51 | NS        | NS        | 99.12± 1.51 | NS        | NS        | 99.12± 1.51 | NS        | NS        |
| <i>AZ11/mpk3</i> | 92.61±7.23 | NS       | NS        | 100.00±0.00 | NS       | NS        | 100.00±0.00 | NS        | NS        | 100.00±0.00 | NS        | .         | 100.00±0.00 | NS        | -         |

**Suppl. Table S2.2: Percentage germination of seeds of indicated plant lines on ½ MS+ 0.25% sucrose + 150 mM NaCl at various time points**

| Plant lines      | Day 1     |           |           | Day 2      |           |           | Day 3         |           |           | Day 4         |           |           | Day 5        |           |           |
|------------------|-----------|-----------|-----------|------------|-----------|-----------|---------------|-----------|-----------|---------------|-----------|-----------|--------------|-----------|-----------|
|                  | Mean ± SD | p value * | p value # | Mean ± SD  | p value * | p value # | Mean ± SD     | p value * | p value # | Mean ± SD     | p value * | p value # | Mean ± SD    | p value * | p value # |
| <i>ColO</i>      | 0.79±1.37 | X         | NS        | 13.28±5.00 | X         | 0.037     | 37.70± 2.67   | X         | 0.011     | 57.01 ± 7.14  | X         | 0.008     | 72.26 ± 2.00 | X         | 0.003     |
| <i>AZ11</i>      | 3.24±2.29 | NS        | X         | 26.03±6.42 | 0.037     | X         | 64.34 ± 11.16 | 0.011     | X         | 84.58 ± 9.18  | 0.008     | X         | 92.18 ± 6.05 | 0.003     | X         |
| <i>azi1</i>      | 0.00±0.00 | NS        | 0.030     | 0.00±0.00  | 0.003     | < 0.001   | 0.71±1.42     | < 0.001   | < 0.001   | 1.35±1.58     | < 0.001   | < 0.001   | 6.53 ± 6.74  | < 0.001   | < 0.001   |
| <i>mpk3</i>      | 0.00±0.00 | NS        | 0.063     | 0.00±0.00  | 0.010     | 0.001     | 1.04±1.80     | < 0.001   | < 0.001   | 3.19±3.12     | < 0.001   | < 0.001   | 38.14±23.96  | NS        | 0.007     |
| <i>AZ11/mpk3</i> | 0.00±0.00 | NS        | NS        | 0.00±0.00  | 0.038     | 0.006     | 4.72±0.39     | < 0.001   | 0.002     | 20.41 ± 10.01 | 0.016     | 0.001     | 53.19± 6.08  | 0.013     | 0.002     |

p value \* indicates the difference between means (by t-test) between *ColO* and individual lines. p value # value indicates the difference between means (by t-test) between *AZ11* and individual line. ‘ - ’ indicates that t test could not be computed as SD of both groups is 0.00, NS: Not significant, SD: Standard deviation

**Suppl. Table S2.3: p values indicating differences between means for mpk3 and AZI1 x mpk3 by t-test for percentage germination on ½ MS+ 0.25% sucrose + 150 mM NaCl at various time points.**

|                                   | Day 1 | Day 2 | Day 3         | Day 4                 | Day 5 |
|-----------------------------------|-------|-------|---------------|-----------------------|-------|
| ½ MS+ 0.25% sucrose               | NS    | NS    | NS            | NS                    | NS    |
| ½ MS+ 0.25% sucrose + 150 mM NaCl | -     | -     | NS<br>(0.073) | Borderline<br>(0.058) | NS    |

' - ' indicates that t test could not be computed as SD of both groups is 0.00 , NS: Not significant, SD: Standard deviation

**Suppl. Table S2.4 : Percentage survival of 3 day old seedlings of indicated plant lines after transfer to ½ MS+ 0.25% sucrose + 250 mM NaCl at various time points.**

| Plant lines      | 12 hours    |           |           | 24 hours    |           |           | 36 hours      |           |           | 48 hours      |           |           | 60 hours      |           |           | 72 hours    |           |           |
|------------------|-------------|-----------|-----------|-------------|-----------|-----------|---------------|-----------|-----------|---------------|-----------|-----------|---------------|-----------|-----------|-------------|-----------|-----------|
|                  | Mean ± SD   | p value * | p value # | Mean ± SD   | p value * | p value # | Mean ± SD     | p value * | p value # | Mean ± SD     | p value * | p value # | Mean ± SD     | p value * | p value # | Mean ± SD   | p value * | p value # |
| <i>ColO</i>      | 100.00±0.00 | X         | X         | 90.00±11.5  | X         | X         | 26.25 ± 4.78  | X         | X         | 13.75 ± 4.78  | X         | X         | 6.25 ± 4.78   | X         | X         | 3.75 ± 4.78 | X         | X         |
| <i>AZ11</i>      | 100.00±0.00 | -         | X         | 100.00±0.00 | NS        | X         | 61.25 ± 6.29  | <0.001    | X         | 35.00 ± 12.24 | 0.018     | X         | 15.00 ± 11.54 | NS        | X         | 8.75 ± 8.53 |           | X         |
| <i>azi1</i>      | 100.00±0.00 | -         | -         | 62.50±5.00  | 0.005     | <0.001    | 10.00 ± 14.14 | NS        | 0.001     | 10.00 ± 14.14 | NS        | 0.037     | 2.5 ± 5.00    | NS        | NS        | 2.5 ± 5.00  | NS        | NS        |
| <i>mpk3</i>      | 100.00±0.00 | -         | -         | 76.67±15.27 | NS        | 0.025     | 15.00 ± 5.00  | 0.029     | <0.001    | 10.00 ± 10.00 | NS        | 0.035     | 3.33 ± 5.7    | NS        | NS        | 0.00 ± 0.00 | NS        | NS        |
| <i>AZ11/mpk3</i> | 100.00±0.00 | -         | -         | 93.33±5.77  | NS        | NS        | 26.67 ± 5.77  | 0.001     | 0.001     | 13.33 ± 5.77  | 0.038     | 0.038     | 5.00 ± 8.666  | NS        | NS        | 1.67 ± 2.88 | NS        | NS        |

p value \* indicates the difference between means (by t-test) between *ColO* and individual lines. p value # indicates the difference between means (by t-test) between *AZ11* and individual line. ‘ - ’ indicates that t test could not be computed as SD of both groups is 0.00 , NS: Not significant, SD: Standard deviation

**Suppl. Table S2.5: p values indicating differences between means for *mpk3* and *AZ11 x mpk3* by t-test for percentage survival of 3 day old seedlings after transfer to on ½ MS+ 0.25% sucrose + 250 mM NaCl at various time points.**

|                                   | 12 hours | 24 hours | 36 hours | 48 hours | 60 hours | 72 hours |
|-----------------------------------|----------|----------|----------|----------|----------|----------|
| ½ MS+ 0.25% sucrose + 250 mM NaCl | NS       | NS       | NS       | NS       | NS       | NS       |

‘ - ’ indicates that t test could not be computed as SD of both groups is 0.00 , NS: Not significant, SD: Standard deviation

Col-O     *azi1*

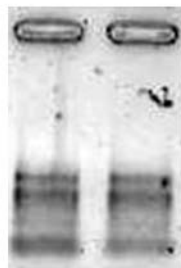

**RNA**

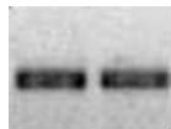

***Actin2***

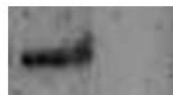

***AZI fo1/re7***

**Suppl. figure S1**

Confirmation of knock-out *azi1* mutant by RT-PCR.

Total RNA was isolated from 14-day-old seedlings. cDNA samples were amplified with primers for *Actin2* (control) or for *AZI1*.

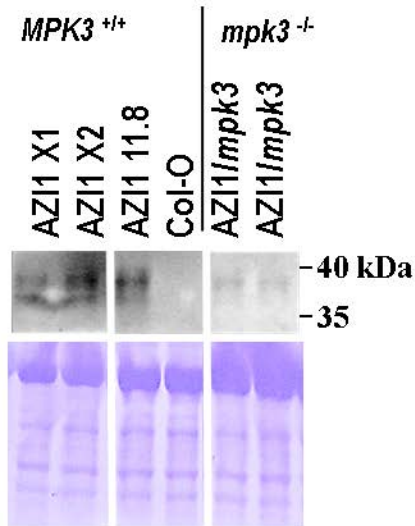

### Suppl. figure S2

#### Lower AZI1 levels in *35S::AZI1/mpk3* lines are related to the *mpk3* mutant background.

Proteins were extracted from 14-day-old seedlings originating from crossings of the *AZI1* overexpressing line 11.8 with *mpk3*. AZI1-myc protein was detected by immunoblot analysis after SDS-PAGE. Protein loading was visualised by Coomassie-blue staining. AZI1 X1 and X2 are wildtype for *MPK3*, while *AZI1/mpk3* (two independent lines shown) lack a functional *MPK3* allele. X1 and X2 have undergone the same crossing and seed propagation procedure as *AZI1/mpk3*



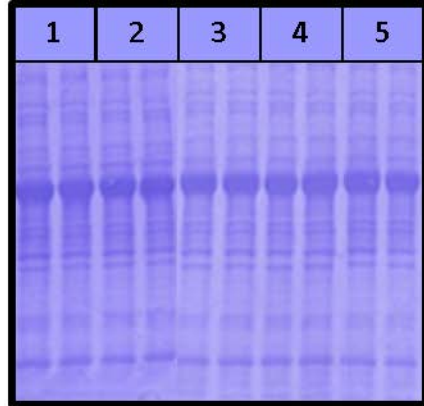

1 Col-O wild type  
2 *azi1*  
3 35S::*AZI1*  
4 35S::*AZI1/mpk3*  
5 *mpk3*

### Figure S3

**The overall protein profiles in Arabidopsis wild-type, *azi1*, *mpk3*, 35S-AZI1 and 35S-AZI1/*mpk3* plants look similar.**

Proteins from 14-day-old seedlings of the indicated lines (independent duplicate samples) were extracted in standard extraction bufferA. 15  $\mu\text{g}$  of the soluble protein fraction was separated by SDS-PAGE and visualised by Coomassie Blue staining.

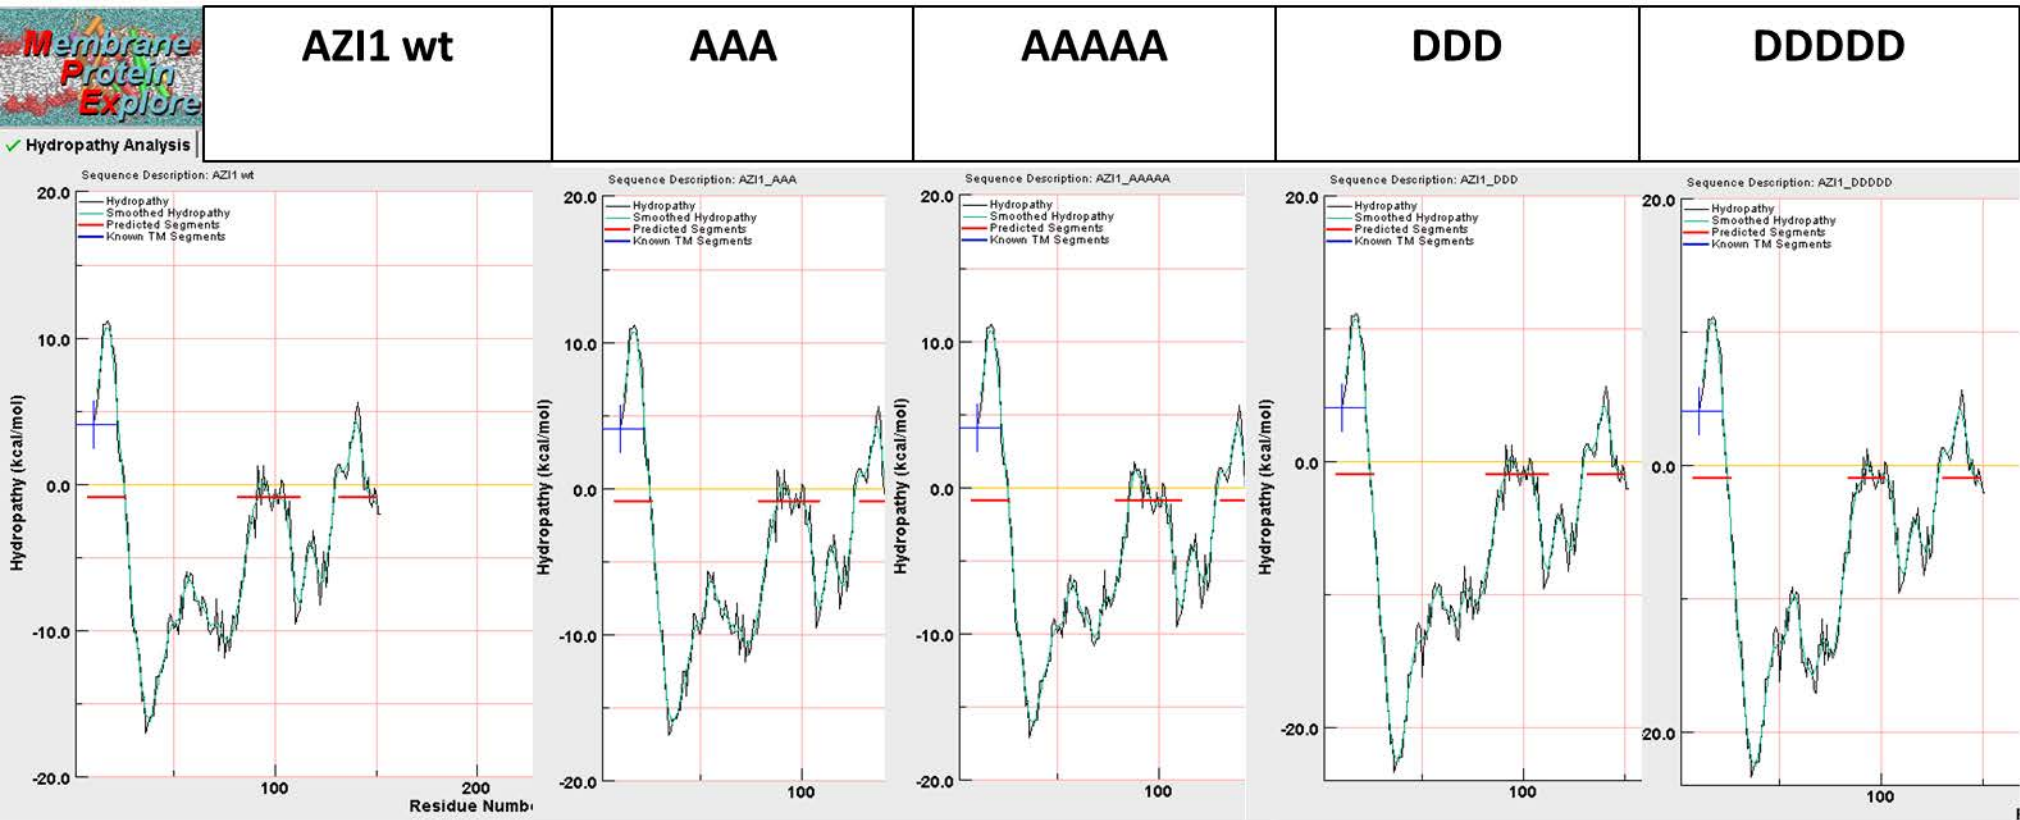

**Figure S4**

**Hydrophathy profile of AZI1 and variants carrying dephosphomimetic (alanine, A) or phosphomimetic (aspartate, D) residues at putative MAPK phosphorylation sites (Ser33, Ser41, Ser59, Thr66, Thr70).**

Data were computed for the full-length AZI1 protein sequence with or without one of the following replacements:

„AAA“: S33A,S41A,S59A

„DDD“: S33D,S41D,S59D

„AAAAA“: S33A,S41A,S59A,T66A,T70A

„DDDDD“: D,S41D,S59D,T66D,T70D

The **black curve** is the actual profile; the superimposed green curve is a smoothed version of the profile.

Regions that have a favorable free energy of transfer (predicted membrane-located regions) are indicated with horizontal red bars.

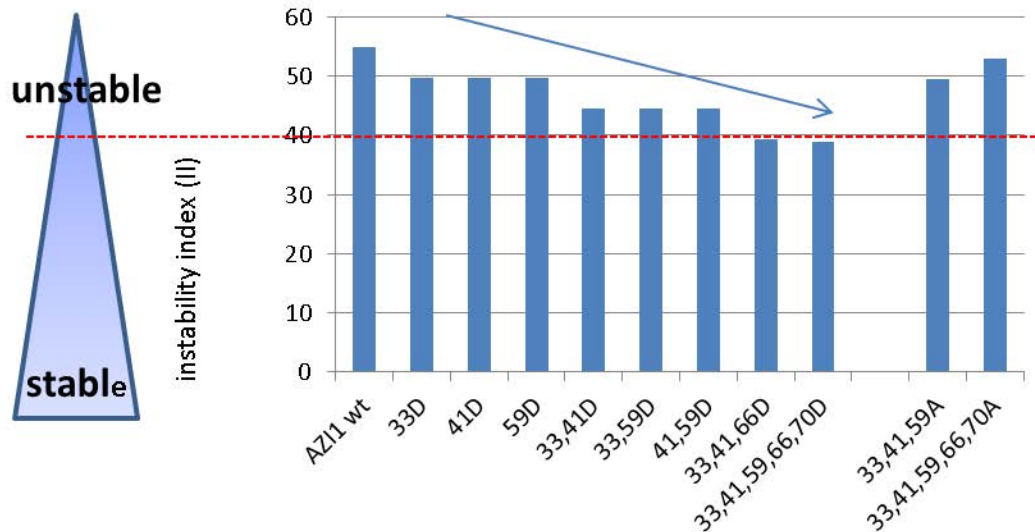

**Figure S5**

**Predicted stability of AZI1 and phosphovariant proteins.**

Sequences were submitted to the ExPASyProtParam tool. The computed instability index (II) inversely correlates with protein stability. Proteins with  $II < 40$  are predicted as stable. Note the decline in II upon successive exchange of putative phosphorylation sites by phosphomimetic aspartate (D) but not by dephosphomimetic alanine (A) residues.

```
##gff-version 2
##source-version NetOGlyc 4.0.0.13
##date 13-10-2
##Type Protein
```

| #seqname | source            | feature  | start | end | score      | strand | frame | comment   |
|----------|-------------------|----------|-------|-----|------------|--------|-------|-----------|
| Sequence | netOGlyc-4.0.0.13 | CARBOHYD | 3     | 3   | 0.0237477  | .      | .     |           |
| Sequence | netOGlyc-4.0.0.13 | CARBOHYD | 6     | 6   | 0.0140939  | .      | .     |           |
| Sequence | netOGlyc-4.0.0.13 | CARBOHYD | 8     | 8   | 0.0154175  | .      | .     |           |
| Sequence | netOGlyc-4.0.0.13 | CARBOHYD | 21    | 21  | 0.0422643  | .      | .     |           |
| Sequence | netOGlyc-4.0.0.13 | CARBOHYD | 23    | 23  | 0.041661   | .      | .     |           |
| Sequence | netOGlyc-4.0.0.13 | CARBOHYD | 26    | 26  | 0.0253381  | .      | .     |           |
| Sequence | netOGlyc-4.0.0.13 | CARBOHYD | 33    | 33  | 0.965155   | .      | .     | #POSITIVE |
| Sequence | netOGlyc-4.0.0.13 | CARBOHYD | 41    | 41  | 0.990921   | .      | .     | #POSITIVE |
| Sequence | netOGlyc-4.0.0.13 | CARBOHYD | 56    | 56  | 0.989681   | .      | .     | #POSITIVE |
| Sequence | netOGlyc-4.0.0.13 | CARBOHYD | 59    | 59  | 0.99397    | .      | .     | #POSITIVE |
| Sequence | netOGlyc-4.0.0.13 | CARBOHYD | 66    | 66  | 0.985554   | .      | .     | #POSITIVE |
| Sequence | netOGlyc-4.0.0.13 | CARBOHYD | 70    | 70  | 0.952655   | .      | .     | #POSITIVE |
| Sequence | netOGlyc-4.0.0.13 | CARBOHYD | 73    | 73  | 0.671541   | .      | .     | #POSITIVE |
| Sequence | netOGlyc-4.0.0.13 | CARBOHYD | 74    | 74  | 0.790337   | .      | .     | #POSITIVE |
| Sequence | netOGlyc-4.0.0.13 | CARBOHYD | 77    | 77  | 0.615299   | .      | .     | #POSITIVE |
| Sequence | netOGlyc-4.0.0.13 | CARBOHYD | 93    | 93  | 0.0288631  | .      | .     |           |
| Sequence | netOGlyc-4.0.0.13 | CARBOHYD | 94    | 94  | 0.0537127  | .      | .     |           |
| Sequence | netOGlyc-4.0.0.13 | CARBOHYD | 104   | 104 | 0.0352132  | .      | .     |           |
| Sequence | netOGlyc-4.0.0.13 | CARBOHYD | 105   | 105 | 0.0407821  | .      | .     |           |
| Sequence | netOGlyc-4.0.0.13 | CARBOHYD | 110   | 110 | 0.0453348  | .      | .     |           |
| Sequence | netOGlyc-4.0.0.13 | CARBOHYD | 126   | 126 | 0.00905412 | .      | .     |           |
| Sequence | netOGlyc-4.0.0.13 | CARBOHYD | 142   | 142 | 0.0832123  | .      | .     |           |
| Sequence | netOGlyc-4.0.0.13 | CARBOHYD | 144   | 144 | 0.0126749  | .      | .     |           |
| Sequence | netOGlyc-4.0.0.13 | CARBOHYD | 156   | 156 | 0.0469291  | .      | .     |           |

30-KPSPKPKPVPSPKPKPVQCPPPRPSPVSPNPRPVTPPRTIPGSSGNSCPIDALKLGVCANVLSLLNIQL-100  
 30-KPSPKPKPVPSPKPKPVQCPPPRPSPVSPNPRPVTPPRTIPGSSGNSCPIDALKLGVCANVLSLLNIQL-100

## Suppl. figure S6.

Predicted O-glycosylation sites in AZI1.

The full-length AZI1 protein sequence was analysed using the bioinformatic online tool NetOGlyc, according to which “scores higher than 0.5 are predicted as glycosylated and marked with the string “#POSITIVE” in the comment field”. The relevant region comprising all predicted sites is displayed at the bottom. Nine candidate target sites for O-glycosylation (blue) are contained in the proline-rich domain of AZI1. Five of these (Ser33, Ser41, Ser59, Thr66, Thr70) overlap with putative MAPK target sites (red) (see also figure 1).
